# Supplementary material for: Osteogenic differentiation potential of porcine bone marrow mesenchymal stem cell subpopulations selected in different basal media
Source: PubMed Central journal article supplement (PMC7595700; doi:10.1242/bio.053280), 2020-10-19
Supplement: biolopen-9-053280-s1.pdf [file biolopen-9-053280-s1.pdf]

Table S1: Comparison of media composition used for this study. The composition of the individual media were obtained from M/s, HiMedia Laboratories and the mixed media were calculated

| Composition                           | Media |        |       |           |           |           |
|---------------------------------------|-------|--------|-------|-----------|-----------|-----------|
|                                       | AMEM  | aDMEM  | M199  | AMEM+M199 | DMEM+M199 | AMEM+DMEM |
| <b>Inorganic salts (mg/L)</b>         |       |        |       |           |           |           |
| Calcium chloride dihydrate            | 265   | 265    | 265   | 265       | 265       | 265       |
| Ferric nitrate nonahydrate            | 0     | 0.1    | 0.72  | 0.36      | 0.41      | 0.05      |
| Magnesium sulphate anhydrous          | 97.72 | 97.72  | 97.72 | 97.72     | 97.72     | 97.72     |
| Potassium chloride                    | 400   | 400    | 400   | 400       | 400       | 400       |
| Sodium acetate anhydrous              | 0     | 0      | 50    | 25        | 25        | 0         |
| Sodium bicarbonate                    | 2200  | 3700   | 2200  | 2200      | 2950      | 2950      |
| Sodium chloride                       | 6800  | 6400   | 6800  | 6800      | 6600      | 6600      |
| Sodium dihydrogen phosphate anhydrous | 122   | 109    | 122   | 122       | 115.5     | 115.5     |
| <b>Amino acids(mg/L)</b>              |       |        |       |           |           |           |
| Glycine                               | 50    | 30     | 50    | 50        | 40        | 40        |
| L-Alanine                             | 25    | 0      | 25    | 25        | 12.5      | 12.5      |
| L-Arginine hydrochloride              | 126   | 84     | 70    | 98        | 77        | 105       |
| L-Asparagine monohydrate              | 50    | 0      | 0     | 25        | 0         | 25        |
| L-Aspartic acid                       | 30    | 0      | 30    | 30        | 15        | 15        |
| L-Cysteine hydrochloride              | 100   | 0      | 0.1   | 50.05     | 0.05      | 50        |
| L-Cystine dihydrochloride             | 31.3  | 62.57  | 26    | 28.65     | 44.285    | 46.935    |
| L-Glutamic acid                       | 75    | 0      | 67    | 71        | 33.5      | 37.5      |
| L-Histidine hydrochloride monohydrate | 42    | 42     | 22    | 32        | 32        | 42        |
| L-Hydroxyproline                      | 0     | 0      | 10    | 5         | 5         | 0         |
| L-Isoleucine                          | 52    | 105    | 20    | 36        | 62.5      | 78.5      |
| L-Leucine                             | 52    | 105    | 60    | 56        | 82.5      | 78.5      |
| L-Lysine hydrochloride                | 72.5  | 146    | 70    | 71.25     | 108       | 109.25    |
| L-Methionine                          | 15    | 30     | 15    | 15        | 22.5      | 22.5      |
| L-Phenylalanine                       | 32    | 66     | 25    | 28.5      | 45.5      | 49        |
| L-Proline                             | 40    | 0      | 40    | 40        | 20        | 20        |
| L-Serine                              | 25    | 42     | 25    | 25        | 33.5      | 33.5      |
| L-Threonine                           | 48    | 95     | 30    | 39        | 62.5      | 71.5      |
| L-Tryptophan                          | 10    | 16     | 10    | 10        | 13        | 13        |
| L-Tyrosine disodium salt              | 51.9  | 103.79 | 57.66 | 54.78     | 80.725    | 77.845    |
| L-Valine                              | 46    | 94     | 25    | 35.5      | 59.5      | 70        |
| <b>Vitamins (mg/L)</b>                |       |        |       |           |           |           |
| L-Ascorbic acid                       | 50    | 0      | 0.05  | 25.025    | 0.025     | 25        |
| Calciferol                            | 0     | 0      | 0.1   | 0.05      | 0.05      | 0         |
| Choline chloride                      | 1     | 4      | 0.5   | 0.75      | 2.25      | 2.5       |
| D-Biotin                              | 0.1   | 0      | 0.01  | 0.055     | 0.005     | 0.05      |
| D-Ca-Pantothenate                     | 1     | 4      | 0.01  | 0.505     | 2.005     | 2.5       |
| DL-Tocopherol phosphate Disodium Salt | 0     | 0      | 0.01  | 0.005     | 0.005     | 0         |

| Composition                 | Media |             |       |           |             |             |
|-----------------------------|-------|-------------|-------|-----------|-------------|-------------|
|                             | AMEM  | aDMEM       | M199  | AMEM+M199 | DMEM+M199   | AMEM+DMEM   |
| Folic acid                  | 1     | 4           | 0.01  | 0.505     | 2.005       | 2.5         |
| Menadione                   | 0     | 0           | 0.01  | 0.005     | 0.005       | 0           |
| Nicotinamide                | 1     | 4           | 0.03  | 0.515     | 2.015       | 2.5         |
| Nicotinic acid              | 0     | 0           | 0.03  | 0.015     | 0.015       | 0           |
| Pyridoxal hydrochloride     | 1     | 4           | 0.03  | 0.515     | 2.015       | 2.5         |
| Pyridoxine hydrochloride    | 0     | 0           | 0.03  | 0.015     | 0.015       | 0           |
| Retinol Acetate             | 0     | 0           | 0.14  | 0.07      | 0.07        | 0           |
| Riboflavin                  | 0.1   | 0.4         | 0.01  | 0.055     | 0.205       | 0.25        |
| Thiamine hydrochloride      | 1     | 4           | 0.01  | 0.505     | 2.005       | 2.5         |
| i-Inositol                  | 2     | 7.2         | 0.05  | 1.025     | 3.625       | 4.6         |
| p-Amino benzoic acid (PABA) | 0     | 0           | 0.05  | 0.025     | 0.025       | 0           |
| Vitamin B12                 | 1.36  | 0           | 0     | 0.68      | 0           | 0.68        |
| <b>Others (mg/L)</b>        |       |             |       |           |             |             |
| Adenine sulphate            | 0     | 0           | 10    | 5         | 5           | 0           |
| Adenosine monophosphate     | 0     | 0           | 0.2   | 0.1       | 0.1         | 0           |
| Adenosine triphosphate      | 0     | 0           | 1     | 0.5       | 0.5         | 0           |
| Cholesterol                 | 0     | 0           | 0.2   | 0.1       | 0.1         | 0           |
| Deoxyribose                 | 0     | 0           | 0.5   | 0.25      | 0.25        | 0           |
| Glucose                     | 1000  | 1000        | 1000  | 1000      | 1000        | 1000        |
| Glutathione reduced         | 0     | 0           | 0.05  | 0.025     | 0.025       | 0           |
| Guanine hydrochloride       | 0     | 0           | 0.3   | 0.15      | 0.15        | 0           |
| Hypoxanthine                | 0     | 0           | 0.354 | 0.177     | 0.177       | 0           |
| Phenol red sodium salt      | 11    | 15.9        | 15    | 13        | 15.45       | 13.45       |
| Polysorbate 80              | 0     | 0           | 4.9   | 2.45      | 2.45        | 0           |
| Ribose                      | 0     | 0           | 0.5   | 0.25      | 0.25        | 0           |
| Thymine                     | 0     | 0           | 0.3   | 0.15      | 0.15        | 0           |
| Uracil                      | 0     | 0           | 0.3   | 0.15      | 0.15        | 0           |
| Xanthine                    | 0     | 0           | 0.344 | 0.172     | 0.172       | 0           |
| Sodium pyruvate             | 110   | 110         | 0     | 55        | 55          | 110         |
| Lipoic acid                 | 0.2   | 0           | 0     | 0.1       | 0           | 0.1         |
| Growth Supplement mix       | 0     | Proprietary | 0     | 0         | Proprietary | Proprietary |

Table S2: Forward (F) and reverse (R) primers used for testing the positive markers (CD105, 90 and 73), negative markers (CD45, 34 and 14) and endogenous control (GAPDH) genes expression in porcine mesenchymal stem cells with their Gen Bank accession numbers, sequence, target (bp), amplicon sizes (bp) and melting temperature (T<sub>m</sub>).

| Gene  | Accession no   | Primers | Sequence (5' to 3')                             | Target (bp)  | Size (bp) | T <sub>m</sub> (°C) |
|-------|----------------|---------|-------------------------------------------------|--------------|-----------|---------------------|
| CD105 | NM_214031.1    | F<br>R  | GCTGCGCTTTGAGGGATCC<br>CCCCAGAGTCGAGATGAGATC    | 977 to 1398  | 422       | 61.48<br>59.11      |
| CD73  | XM_001927095.2 | F<br>R  | TTCTTCTCAACAGCAGCATTCC<br>CACGTGAATTCCGCCACC    | 1024 to 1473 | 450       | 59.18<br>61.69      |
| CD90  | XM_005667396.1 | F<br>R  | GCTCTCTTGCTAACAGTCTTGC<br>CCCCAGAGTCGAGATGAGATC | 146 to 550   | 405       | 59.59<br>58.11      |
| CD45  | XM_003130596.4 | F<br>R  | AGAATACTGGCCGTCGATGG<br>GGATCAAGATGTACTGTGCCTC  | 574 to 1001  | 428       | 59.61<br>58.54      |
| CD34  | XM_005656760.1 | F<br>R  | GACCACCGTAGCCATCTCAG<br>TCACCTCAGATTGGGCAAGG    | 565 to 1028  | 464       | 59.90<br>59.67      |
| CD14  | NM_001097445.2 | F<br>R  | ACCTTATCGACCATGGTGCG<br>TGGCCCACGACACATTACG     | 326 to 800   | 475       | 60.18<br>60.37      |
| GAPDH | NM_001206359.1 | F<br>R  | CCATCTTCCAGGAGCGAGATC<br>AACGCAGGGATGATTTCTGGG  | 109 to 500   | 392       | 58.92<br>59.12      |

Table S3: The list of qPCR primers used for relative quantification of osteogenic differentiation marker and endogenous control (GAPDH) genes with the accession number, sequence target (bp), amplicon sizes (bp) and melting temperature (T<sub>m</sub>).

| Genes  | Accession number | Primers | Sequence (5' - 3')     | Target (bp) | Size (bp) | T <sub>m</sub> (° C) |
|--------|------------------|---------|------------------------|-------------|-----------|----------------------|
| GAPDH  | NM_001206359.1   | F       | GGTCGGAGTGAACGGATTTG   | 108         | 110       | 58.92                |
|        |                  | R       | AGTGGAGGTCAATGAAGGGG   | 218         |           | 59.00                |
| ALP    | AH012163.1       | F       | TCAGCTCCACCACAAACCC    | 411         | 90        | 59.85                |
|        |                  | R       | GCGTTGGTGTGTATGTCTTGG  | 500         |           | 60.35                |
| COL1A1 | XM_005668927.1   | F       | CCCTGCCAGATCTGTGTCTG   | 309         | 155       | 60.11                |
|        |                  | R       | GTGGTTTCCTGGTCGGTGG    | 463         |           | 60.60                |
| SPP1   | NM_214023.1      | F       | AGCGCCACAGAATACTATTTCC | 262         | 83        | 58.53                |
|        |                  | R       | CAGGGCTTTCGTTGGACTTG   | 344         |           | 59.41                |
| BGLAP  | NM_001164004.1   | F       | CACCAACAGACGCACCATG    | 18          | 133       | 59.42                |
|        |                  | R       | CTTGGACACGAAGGCTGCA    | 150         |           | 60.60                |
